# Supplementary material for: Blue sensitive sub-band gap negative photoconductance in SnO2/TiO2 NP bilayer oxide transistor
Source: Royal Society of Chemistry journal article supplement (doi:10.1039/d4nr00406j), 2024-01-01
Supplement: d4nr00406j1.pdf [file d4nr00406j1.pdf]

## Blue sensitive sub-band gap negative photoconductance in SnO<sub>2</sub>/TiO<sub>2</sub> NPs bilayer oxide transistor

Utkarsh Pandey<sup>a‡</sup>, Nila Pal<sup>a‡</sup>, Arpan Ghosh<sup>a</sup>, Swati Suman<sup>a,b</sup>, Sajal Biring<sup>\*c</sup> and Bhola N. Pal<sup>a\*</sup>

<sup>a</sup>*School of Materials Science and Technology, Indian Institute of Technology (Banaras Hindu University), Varanasi-221005, India,*

<sup>b</sup>*Electronic Materials and Thin Films Lab, Department of Metallurgical and Materials Engineering, Indian Institute of Technology (IIT) Madras, Chennai, India*

<sup>c</sup>*Department of Electronic Engineering, Ming Chi University of Technology, New Taipei City, Taiwan 243*

\*Corresponding author E-mail ID: [bnpal.mst@iitbhu.ac.in](mailto:bnpal.mst@iitbhu.ac.in), [biring@mail.mcut.edu.tw](mailto:biring@mail.mcut.edu.tw)

‡ *Those two authors contributed equally.*

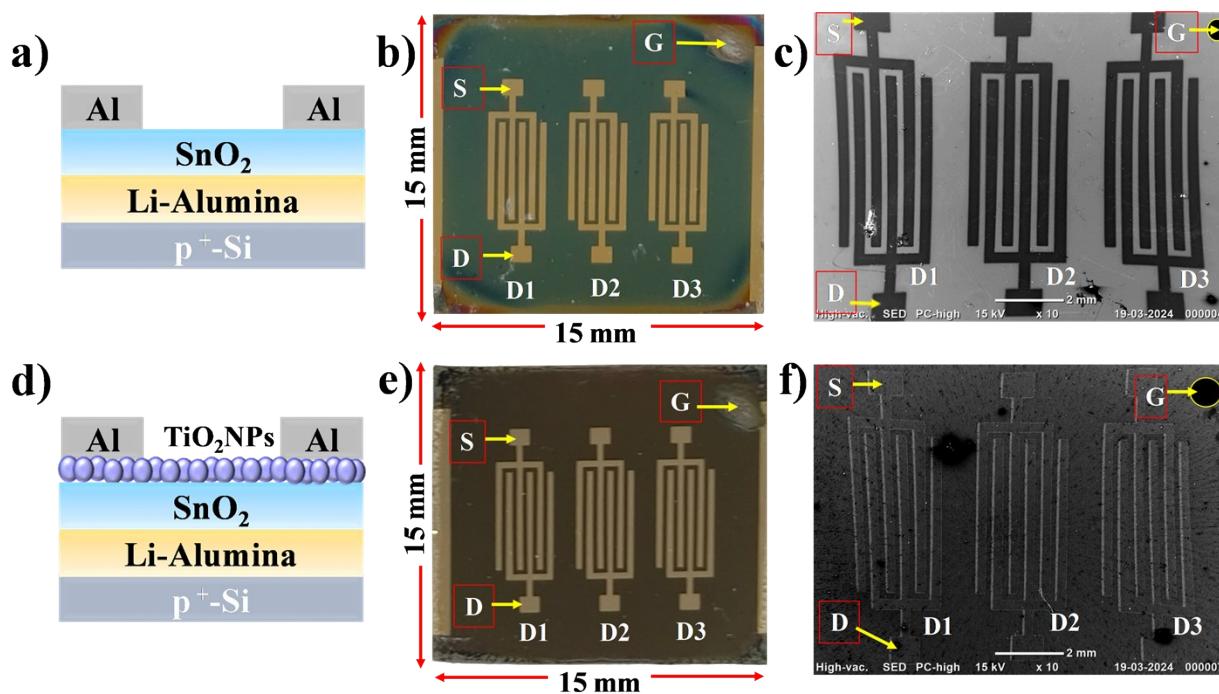

**Figure SI 1** The a) schematic diagram b) actual device c) SEM Image of the TFT 1 and d) schematic diagram e) actual device f) SEM Image of the TFT 2.

## Structural analysis of SnO<sub>2</sub> and TiO<sub>2</sub> NPs

The structural analysis of SnO<sub>2</sub> in this film and TiO<sub>2</sub> nanoparticles (NPs) was conducted through thin-film X-ray diffraction (XRD) patterns. This experiment involved the examination of drop-cast films of SnO<sub>2</sub> annealed at 500 °C for 30 minutes and TiO<sub>2</sub> NP thin films annealed at 120°C for 60 minutes. In Figure S1, the X-ray diffraction (XRD) pattern of both the SnO<sub>2</sub> and TiO<sub>2</sub> NPs thin film samples is presented, revealing distinct diffraction peaks with noticeable broadening, indicative of the nanocrystalline nature of the particles. Based on this data, the XRD peaks for TiO<sub>2</sub> are situated at 24.19°, 36.75°, 46.90°, and 61.75°, corresponding to the (101), (004), (200), and (211) crystallographic planes[1], respectively (JCPDS, 21-1272). This pattern suggests the presence of the anatase phase in TiO<sub>2</sub>. On the other hand, the XRD peaks for SnO<sub>2</sub> are detected at 25.4°, 32.63°, and 50.69°, corresponding to the (211), (101), and (110) crystallographic planes of the tetragonal phase of SnO<sub>2</sub> (JCPDS 88-0287)[2].

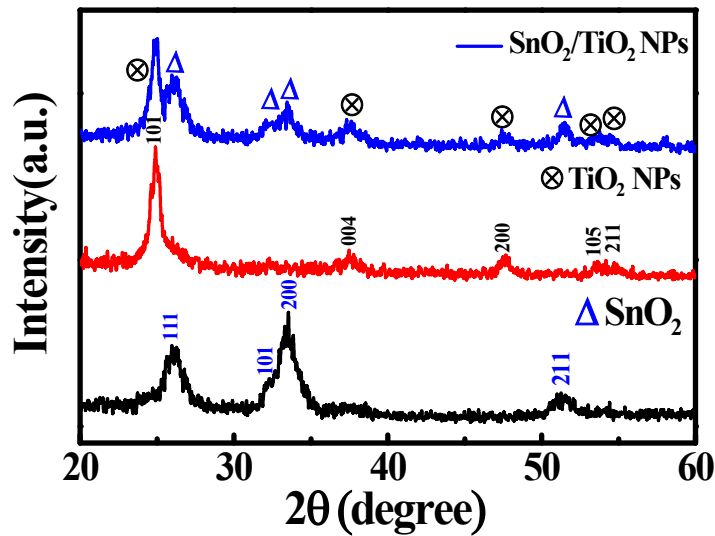

Figure SI 2 XRD pattern of the SnO<sub>2</sub>, TiO<sub>2</sub> NPs, and SnO<sub>2</sub>/TiO<sub>2</sub> films.

### Optical analysis of SnO<sub>2</sub> and TiO<sub>2</sub> NPs films

The UV-Vis absorption data for SnO<sub>2</sub>, TiO<sub>2</sub>, and the SnO<sub>2</sub>/TiO<sub>2</sub> heterojunction thin film are illustrated in Figure SI2 a). In Figure SI2 b), Tauc's plot of the absorption data reveals that both SnO<sub>2</sub> and TiO<sub>2</sub> possess direct band gaps of 3.48 eV and 3.34 eV, respectively. Interestingly, the heterojunction thin film demonstrates a band gap of 3.34 eV. This reveals that the optical property of the SnO<sub>2</sub>/TiO<sub>2</sub> heterostructure is very close to the TiO<sub>2</sub> NPs.

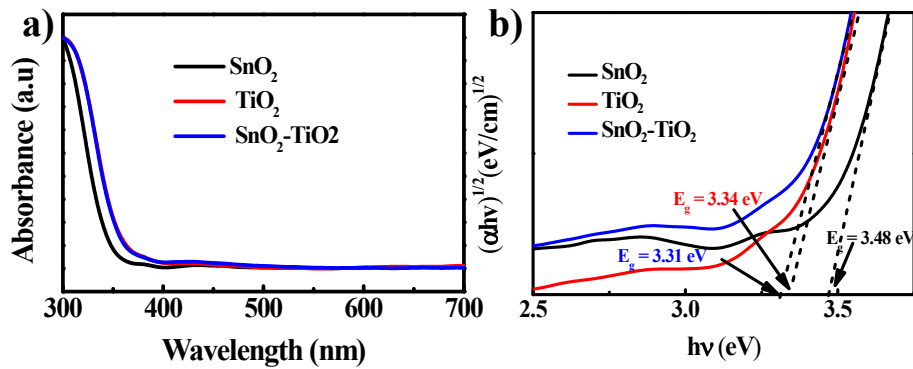

**Figure SI 3** UV-Vis (a) absorption spectra of the SnO<sub>2</sub>, TiO<sub>2</sub>, and SnO<sub>2</sub>/TiO<sub>2</sub> heterostructure and (b) Tauc's plot of the absorption data

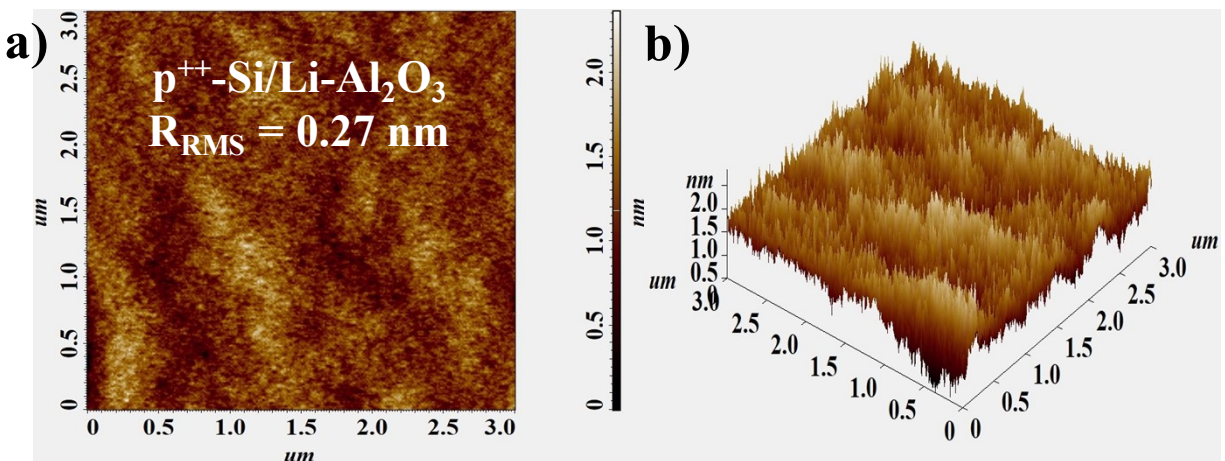

**Figure SI 4** Surface morphology of Li-Al<sub>2</sub>O<sub>3</sub> dielectric on p<sup>+</sup>-Si substrate in a) 2D and b) 3D by atomic force microscopy (AFM).

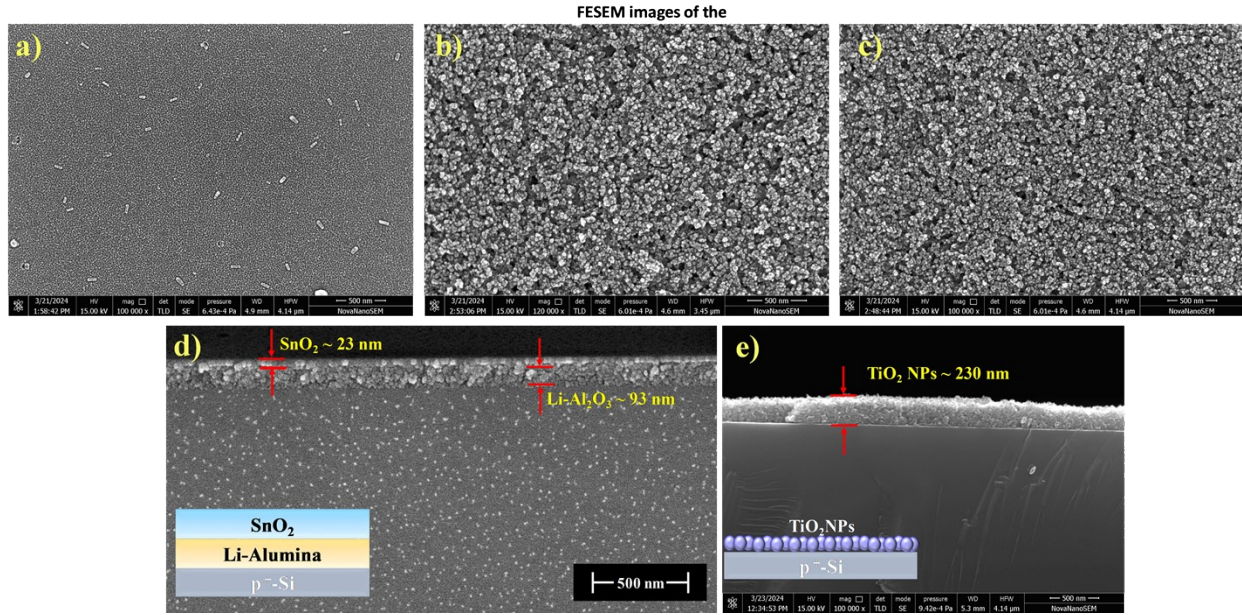

**Figure SI 5** The FESEM images of the a)  $\text{SnO}_2$ , b)  $\text{TiO}_2$  and c)  $\text{SnO}_2/\text{TiO}_2$  NPs; The cross-sectional SEM image of the d)  $\text{SnO}_2/\text{Li-Al}_2\text{O}_3$  bilayer ( $\text{p}^+\text{-Si}/\text{Li-Al}_2\text{O}_3/\text{SnO}_2$ ) and e)  $\text{TiO}_2$  NPs layer ( $\text{p}^+\text{-Si}/\text{TiO}_2$  NPs).

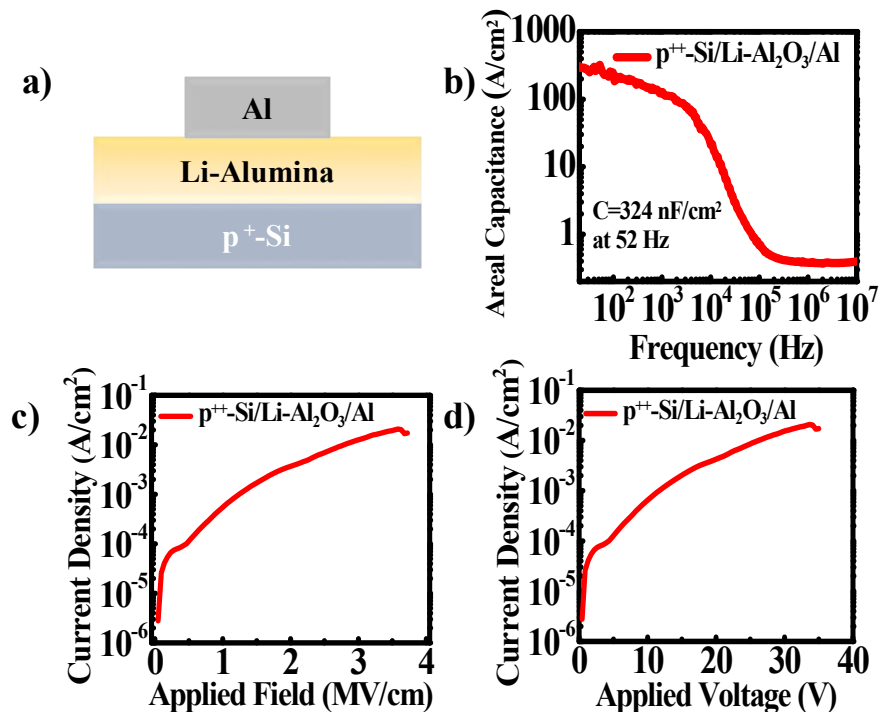

**Figure SI 6** Dielectric property measurement of  $\text{Li-Al}_2\text{O}_3$  a) Schematic diagram of the MIM ( $\text{p}^+\text{-Si}/\text{Li-Al}_2\text{O}_3/\text{Al}$ ) configuration, b) Capacitance vs. frequency plot, c) Current density vs. applied field, and d) current density vs. applied voltage.

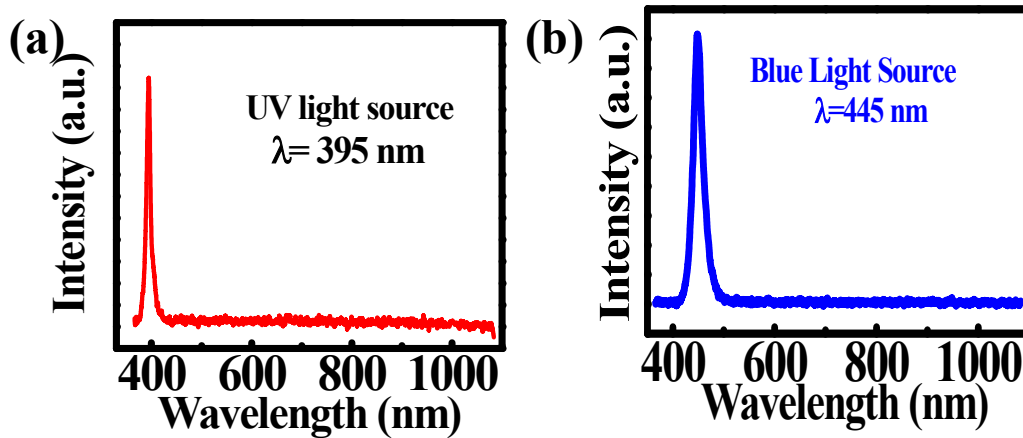

**Figure SI 7** Emission spectra of a) UV light source, and b) blue light source

### **The Optical response of the TFT1**

The optical response of the TFT 1 has been tested under two LED light sources (UV and blue) with wavelength 395 and 445 nm has been used to illuminate the devices. The spectra of these light sources have been shown in figure SI 5 a) and b), having peak intensities at wavelengths of 395 and 445 nm, respectively. Figure SI 8 a), shows the optical illumination of the TFT 1 under UV light and the variation of the drain current in transfer and output characteristics under UV illumination for TFT 1 is shown in Figure SI 8 a) and SI 8 b), respectively. Under UV illumination, in both of the characteristics the drain current of the device is increases with UV illumination (direction of black arrow shows). Here, an increase in the photocurrent upon light illumination has been observed, which is feasible with SnO<sub>2</sub> semiconductor because of its wide bandgap, thus UV light-sensitive<sup>43</sup>. This behavior is commonly referred to as the positive photoconductance nature of the device and is particularly pronounced when using optically sensitive materials, such as metal oxide, in TFTs. The working mechanism of the SnO<sub>2</sub> TFT under UV illumination has been

illustrated in Figure SI 8 d). In contrast, the device is not giving any practical change in the transfer characteristics under blue illumination, (Figure SI 8 g&h)).

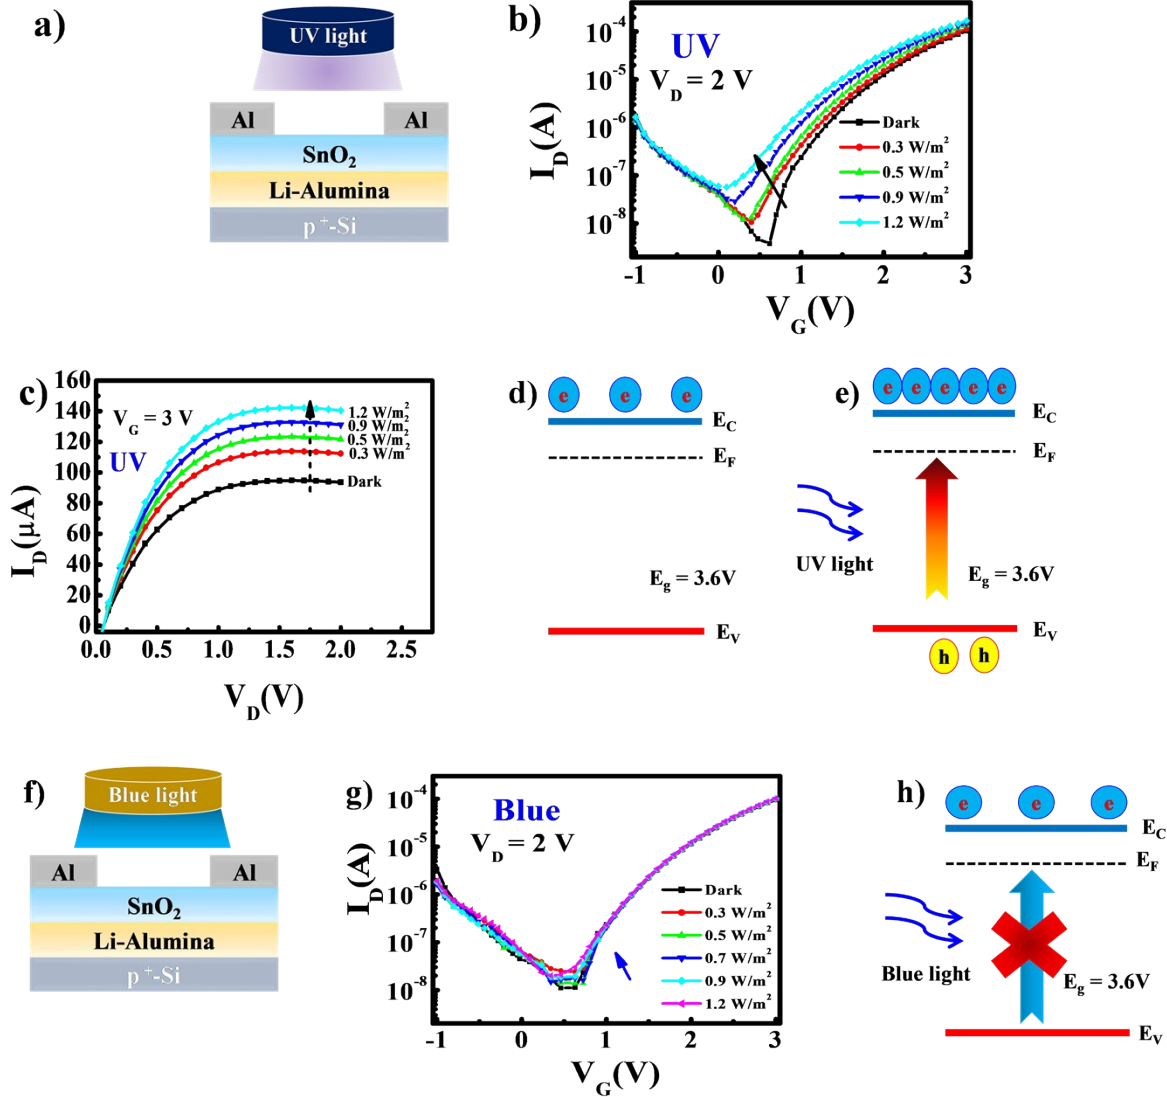

Figure SI 8 a) Schematics of TFT 1 under UV illumination, b) Transfer characteristics at  $V_D = 2\text{ V}$ , and c) Output characteristics at  $V_G = 3\text{ V}$  of the phototransistor with dark and different UV light ( $\lambda = 395\text{ nm}$ ) intensities, black arrow shows the positive shift under UV illumination; d) Schematic diagram of energy band  $\text{SnO}_2$  before and after UV illumination; e) Schematic diagram of bare  $\text{SnO}_2$  transistor illuminated with UV light source and f) Transfer characteristics of the device under dark and blue light illumination at a constant drain voltage of  $2\text{ V}$ , g) f) energy band diagram of  $\text{SnO}_2$  and failed electron-hole pair generation during blue light illumination.

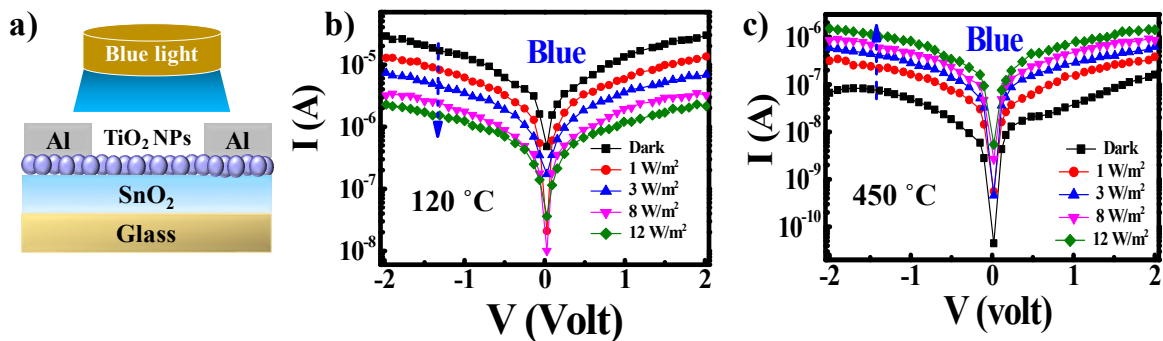

**Figure SI 9** a) Schematic diagram of SnO<sub>2</sub>/TiO<sub>2</sub> heterostructure based photoconductor and the I-V plot of SnO<sub>2</sub>/TiO<sub>2</sub> heterostructure with b) TiO<sub>2</sub> NPs annealing temperature 120 °C for 1 h (blue arrow shows the direction of photo conductance) showing NPC and c) TiO<sub>2</sub> NPs annealing temperature 450 °C for 1 h (blue arrow shows the direction of photo conductance) showing PPC behavior.

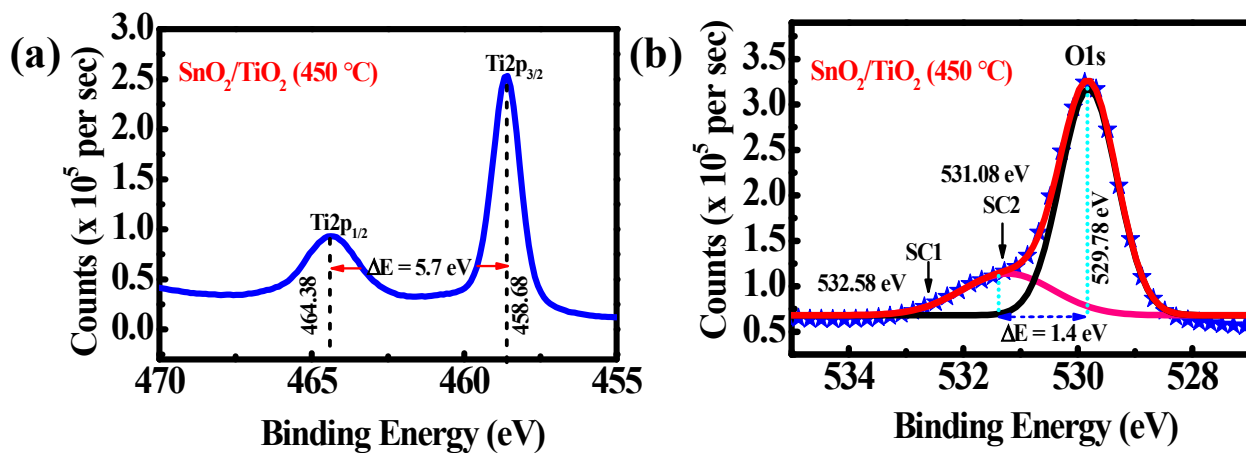

**Figure SI 10** The XPS data of the SnO<sub>2</sub>/TiO<sub>2</sub> heterostructure film a) Ti2p spectrum b) O1s core spectrum with TiO<sub>2</sub> NPs annealing at 450 °C

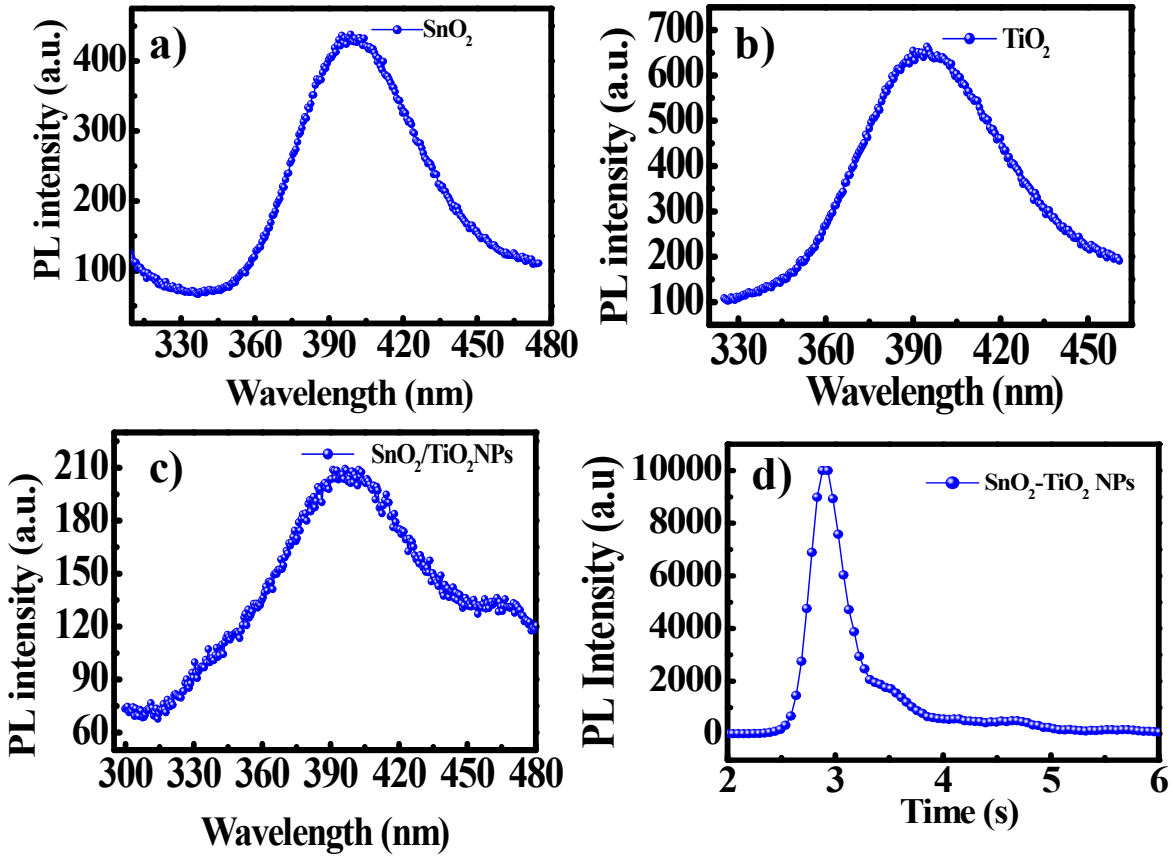

**Figure SI 11** The photo photoluminescence (PL) spectra of the a) SnO<sub>2</sub>, b) TiO<sub>2</sub> NPs and c) SnO<sub>2</sub>/TiO<sub>2</sub> NPs layer; Time resolved PL spectra of SnO<sub>2</sub>/TiO<sub>2</sub> NPs layer.

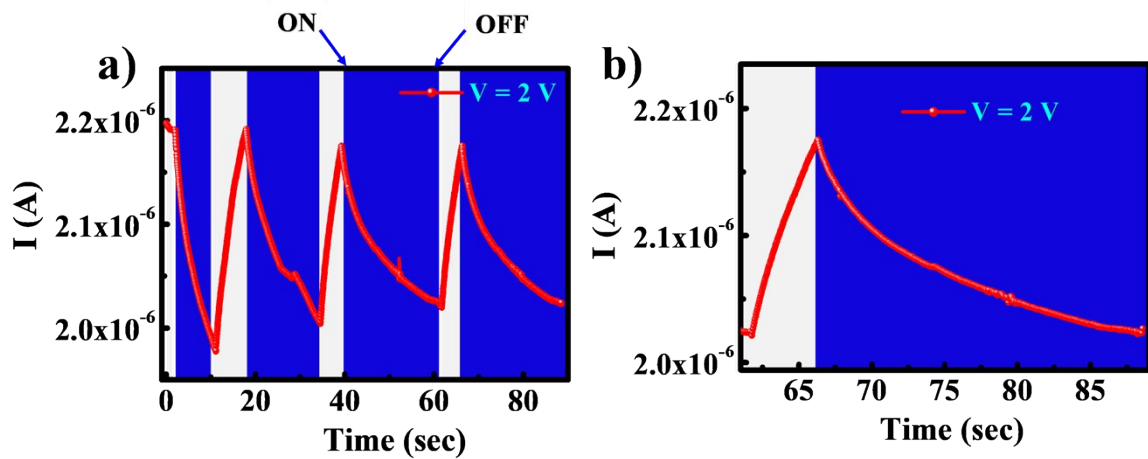

**Figure SI 12.** The transient response of the TFT 2 for prolonged (more than 20 sec) blue light illumination a) multiple cycle b) single cycle at intensity  $1.2 \text{ W/m}^2$ .



- [1] J. Lin, W. Ren, A. Li, C. Yao, T. Chen, X. Ma, X. Wang, A. Wu, Crystal–amorphous core–shell structure synergistically enabling TiO<sub>2</sub> nanoparticles' remarkable SERS sensitivity for cancer cell imaging, *ACS applied materials & interfaces* 12(4) (2019) 4204-4211.
- [2] N. Pal, U. Pandey, S. Biring, B.N. Pal, Solution processed low-voltage metal-oxide transistor by using TiO<sub>2</sub>/Li–Al<sub>2</sub>O<sub>3</sub> stacked gate dielectric, *Journal of Materials Science: Materials in Electronics* 33(12) (2022) 9580-9589.
